# Supplementary material for: In vivo generation of human CD19‐CAR T cells results in B‐cell depletion and signs of cytokine release syndrome
Source: PubMed Central journal article supplement (PMC6220327; doi:10.15252/emmm.201809158), 2018-09-17
Supplement: EMMM-10-e9158-s002.pdf [file EMMM-10-e9158-s002.pdf]

## Expanded View Figures

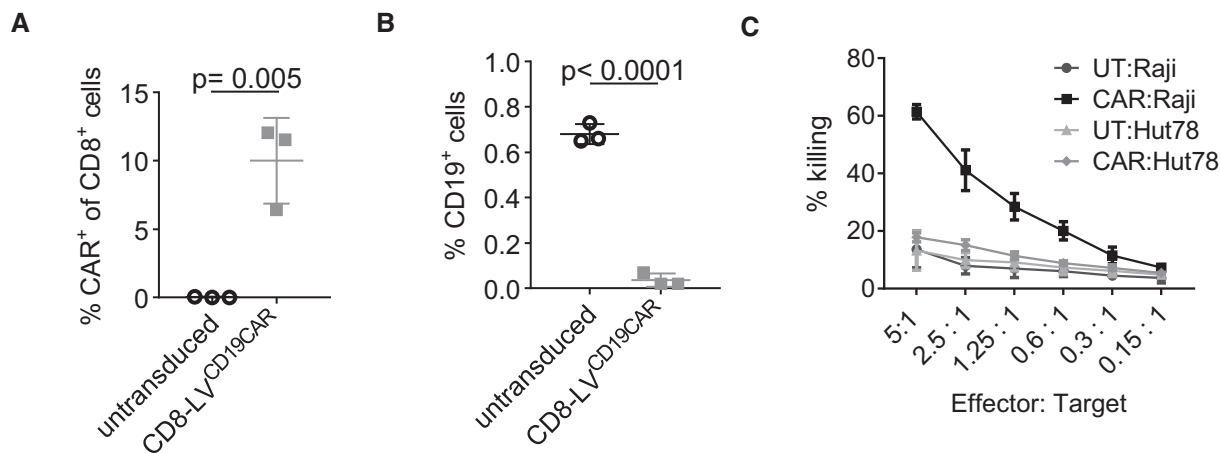

**Figure EV1. Ex vivo CAR T-cell generation.**

A Quantitative data of Fig 1A showing the percentages of CAR<sup>+</sup> cells of three different donors. Mean values  $\pm$  SD are shown with  $n = 3$ . Statistical evaluation of the data was performed using two-tailed unpaired t-test.

B CAR T cells eliminate CD19<sup>+</sup> B cells. PBMC were activated for 3 days and incubated with CD8-LV<sup>CD19CAR</sup>. Expression of CD3 and CD19 was then analyzed by flow cytometry. The percentage of CD19<sup>+</sup> B cells for  $n = 3$  with mean  $\pm$  SD is shown. Statistical significance was determined by two-tailed unpaired t-test.

C Selective killing of CD19<sup>+</sup> Raji tumor cells by ex vivo-generated CAR T cells (CAR) or untransduced T cells (UT) with CD19<sup>+</sup> Raji cells, or as control CD19<sup>-</sup> Hut78 cells. Mean values  $\pm$  SD are shown with  $n = 3$ .

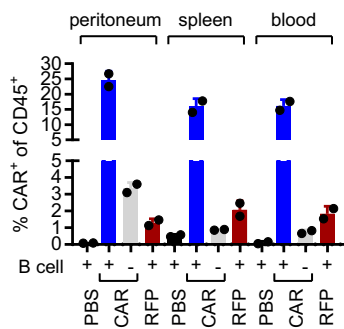

**Figure EV2. Detection of CAR T cells in PBMC-transplanted mice.**

Summary of CAR T-cell detection in PBMC-transplanted NSG by flow cytometry for the same two individual mice of each group shown in Fig 1C. Percentage of CAR<sup>+</sup> cells of CD45<sup>+</sup> cells is shown.

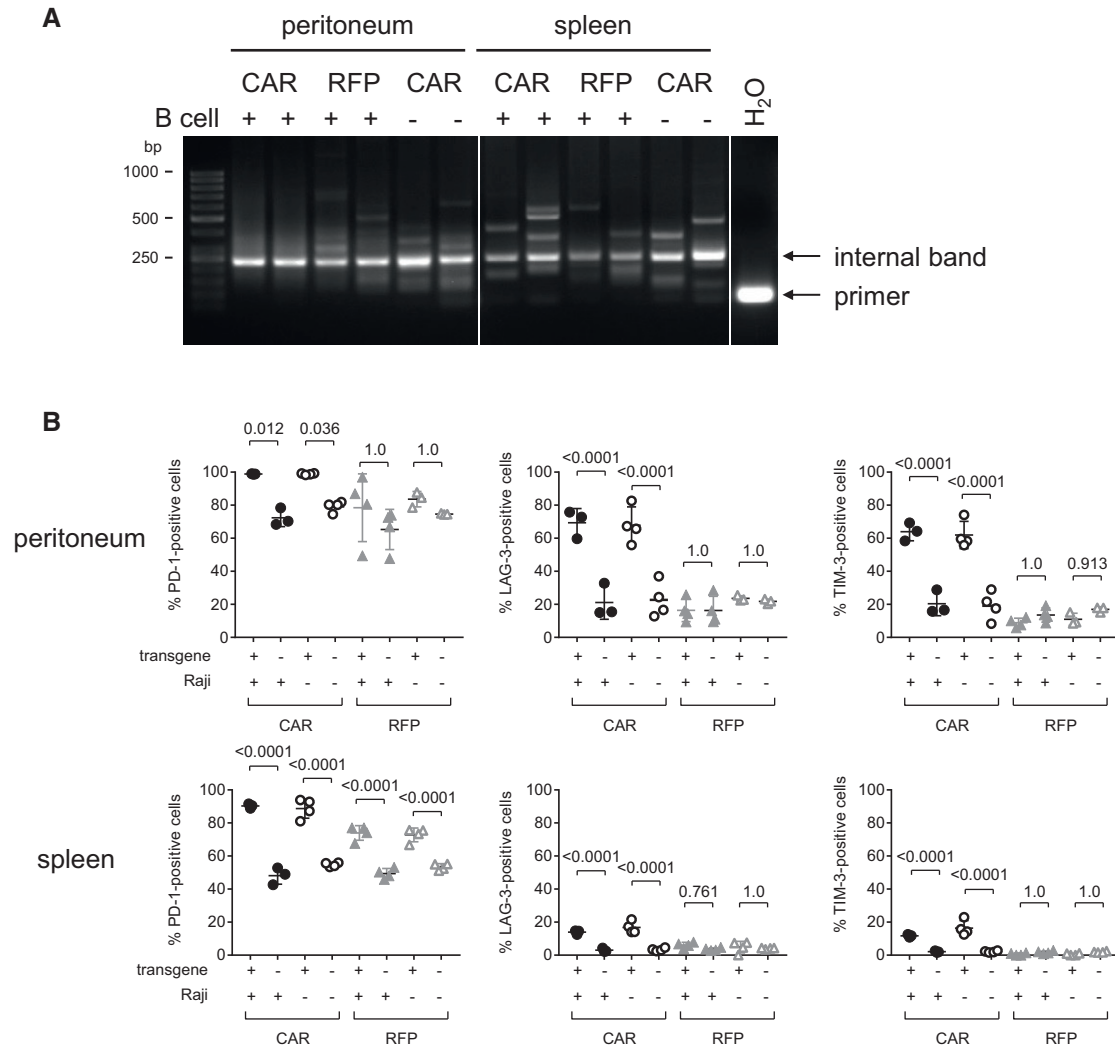

**Figure EV3. Clonality and exhaustion of *in vivo*-generated CAR T cells.**

**A** Clonality analysis by amplifying vector sequences integrated in genomic DNA. LM-PCR detecting the integrated vector in genomic DNA purified from peritoneal and spleen cells harvested from PBMC-transplanted mice injected with CD8-LV<sup>CD19CAR</sup> (CAR) in the presence or absence of B cells or CD8-LV<sup>RFP</sup> (RFP). Two mice of each group were analyzed. The internal control band is indicated as well as primer dimers in the water control (H<sub>2</sub>O).

**B** Cells isolated from peritoneal cavity or spleen of human PBMC-transplanted NSG mice ( $\pm$  i.p. transplanted Raji cells) treated with CD8-LV<sup>CD19CAR</sup> (CAR) or CD8-LV<sup>RFP</sup> (RFP) were analyzed for expression of exhaustion markers by flow cytometry. CD8<sup>+</sup> cells from viable human CD3<sup>+</sup> cells were gated for transgene-positive (CAR<sup>+</sup> or RFP<sup>+</sup>) and transgene-negative (CAR<sup>-</sup> or RFP<sup>-</sup>) cells. These two cell populations were then separately gated for expression of PD-1, LAG-3, and TIM-3. For the four experimental groups, percentages of positive cells for each exhaustion marker are shown for transgene-positive and transgene-negative CD8<sup>+</sup> cells. Mean values  $\pm$  SD are shown.  $N = 3$  in samples with closed circles,  $n = 4$  in samples with open circles or closed triangles, while for samples with open triangles,  $n = 3$  for peritoneum and  $n = 4$  for spleen. Statistical evaluation of the data was performed using one-way ANOVA test with Bonferroni correction.

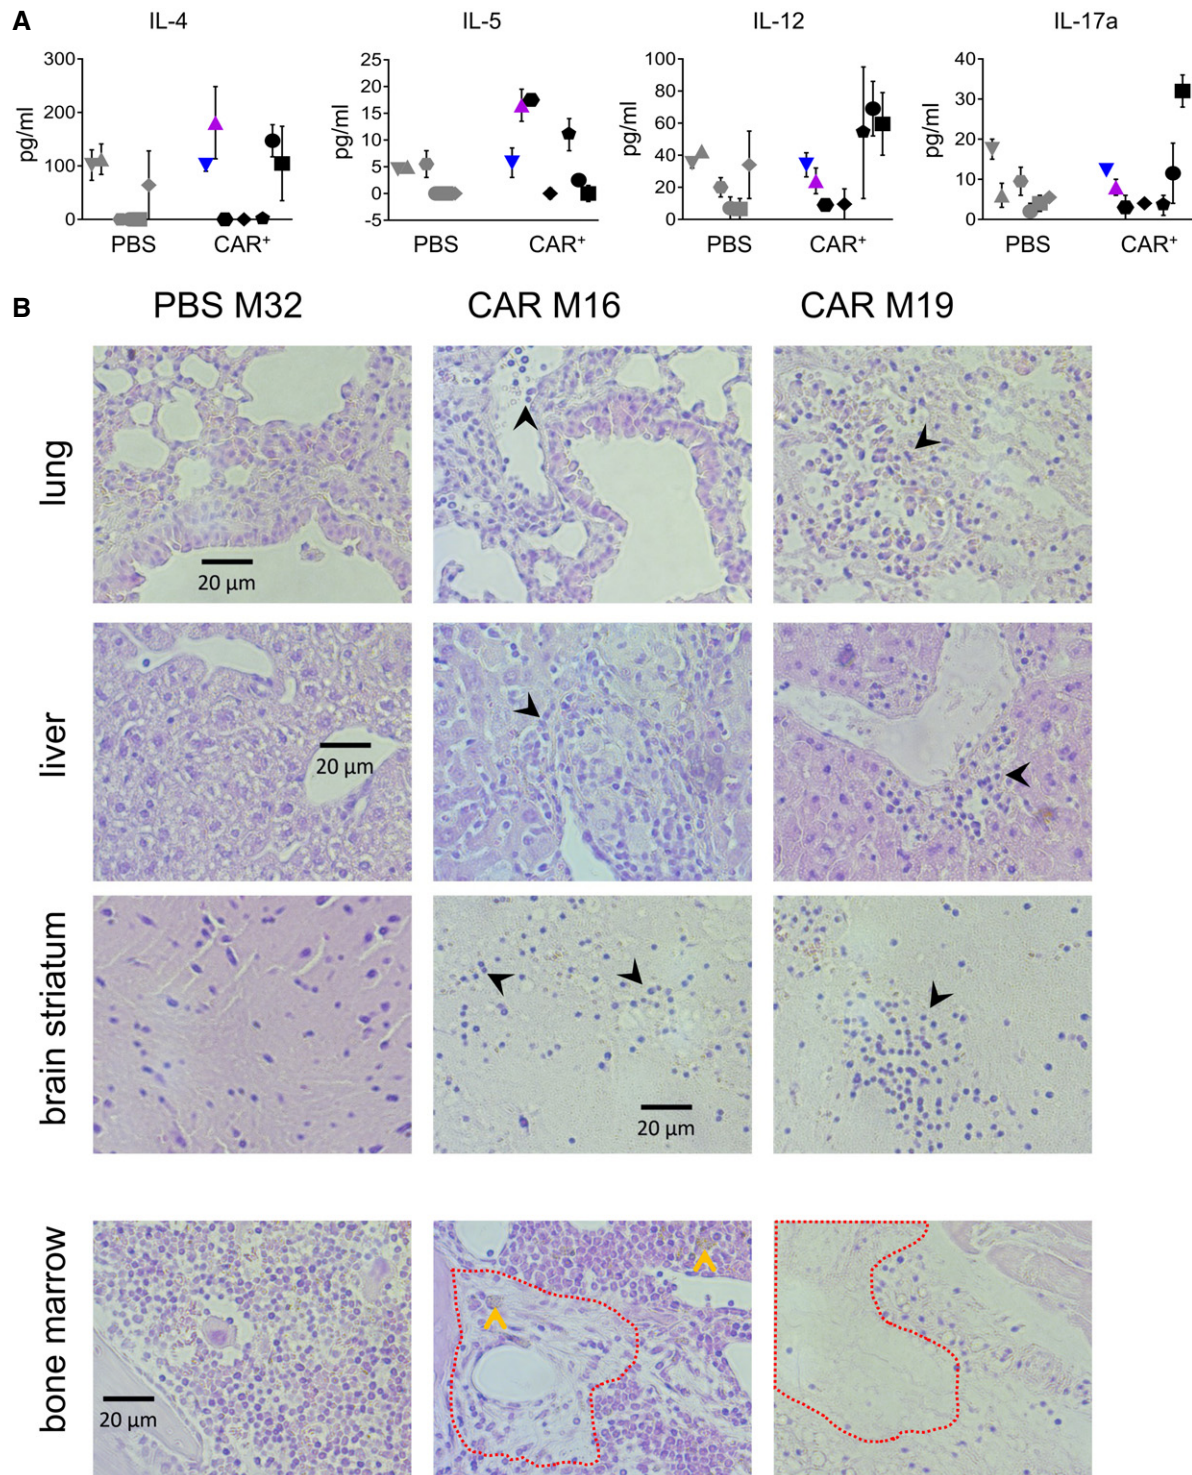

**Figure EV4. Cytokines and organ infiltration.**

- A Levels of further cytokines in plasma of individual mice obtained 7 weeks after vector injection. The distinct symbols used for each individual mouse are identical to the ones used in Fig 2. Mean values of  $n = 2$  technical replicas.
- B Hematoxylin/eosin staining of paraffin-embedded sections from lung, liver, brain striatum, and bone marrow, of the PBS-injected control mouse M32 or the CD8<sub>L<sup>V</sup>CD19-CAR</sub>-injected M16 and M19 animals. Areas of hematopoietic cell depletion in bone marrow are indicated by the red-dashed line and acellular debris by the yellow arrows. Infiltrating lymphocytes in the other tissues are labeled by black arrows.

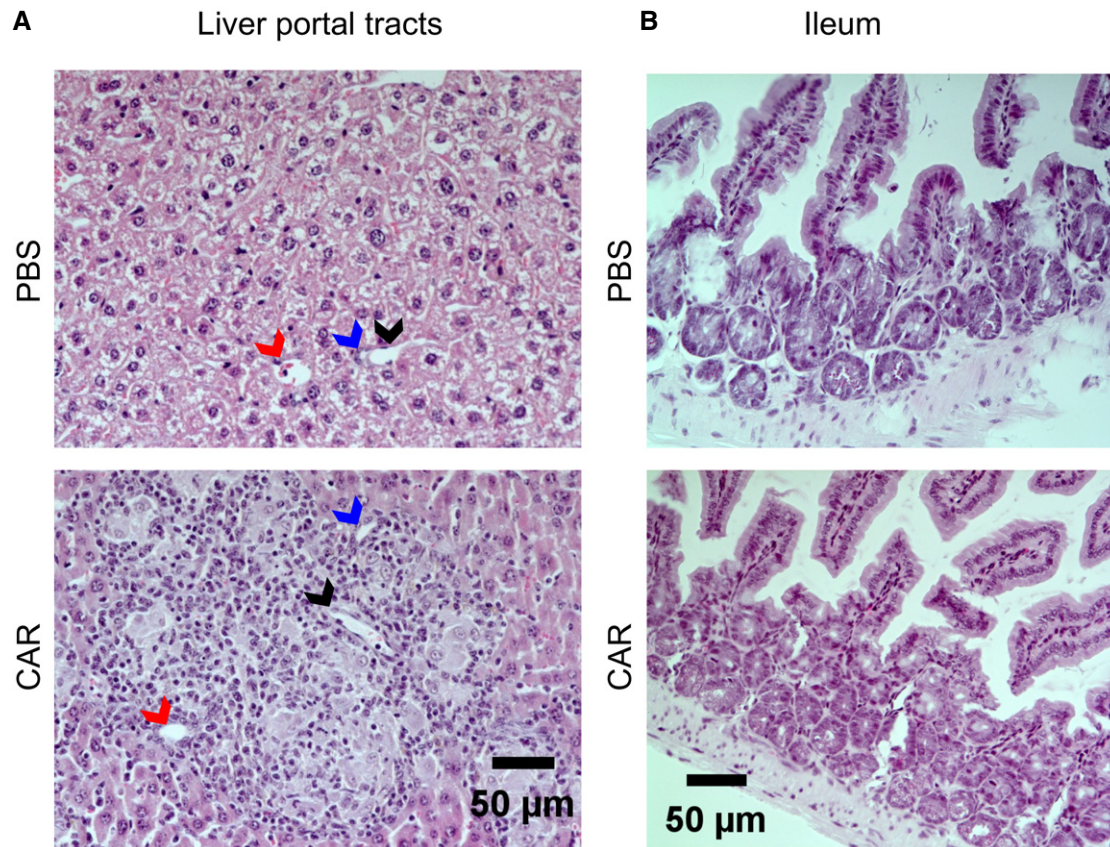

**Figure EV5.** Analysis for signs of GvHD.

A, B Hematoxylin/eosin staining of paraffin-embedded sections from liver portal tracts (A) and ileum (B) of the PBS control mouse M32 and the CAR<sup>+</sup> mouse M16. Arrows point to bile ducts (blue), arterial sinus (red), and portal vein (black).
